# Supplementary material for: Tolerance of Stored Boar Spermatozoa to Autologous Seminal Plasma: A Proteomic and Lipidomic Approach
Source: Int J Mol Sci. 2020 Sep 4;21(18):6474. doi: 10.3390/ijms21186474 (PMC7555833; doi:10.3390/ijms21186474)
Supplement: Supplementary file 1 [file ijms-21-06474-s001.zip › Lipidomics_dataset_filtered_SUPPLEMENTARY.xlsx]

## Sheet: Info
FILTER APPLIED:
lipids that were present in less than 15% of the samples were removed from the dataset

## Sheet: data_filtered_pmol
	CE_16:1	Cer_32:0;2	Cer_32:1;2	Cer_34:0;2	Cer_34:1;2	Cer_34:1;3	Cer_34:2;2	Cer_36:0;2	Cer_36:0;3	Cer_36:1;2	Cer_36:1;3	Cer_36:2;2	Cer_38:0;2	Cer_38:0;3	Cer_38:1;2	Cer_38:1;3	Cer_38:2;2	Cer_38:2;4	Cer_40:0;2	Cer_40:0;3	Cer_40:1;2	Cer_40:2;2	Cer_42:0;3	Cer_42:1;2	Cer_42:1;3	Cer_42:2;2	Cer_44:0;3	Cer_44:1;2	Chol	CL_64:0	DAG_14:0_16:0	DAG_14:0_16:1	DAG_14:0_17:0	DAG_14:0_18:0	DAG_14:0_18:1	DAG_14:0_18:2	DAG_14:1_16:0	DAG_15:0_15:0	DAG_15:0_16:0	DAG_15:0_16:1	DAG_15:0_17:0	DAG_15:0_18:0	DAG_15:0_18:1	DAG_16:0_16:0	DAG_16:0_16:1	DAG_16:0_17:0	DAG_16:0_17:1	DAG_16:0_18:0	DAG_16:0_18:1
s10	0	0.295206	6.87418	0.839655	36.7767	0	0	1.02722	0	179.07	0.892727	0	0.642815	0.186737	52.0428	0.326783	0.591125	0.157455	0	0.192922	20.4182	0.476052	0.419806	7.29634	0	0.994681	0	0.626604	3988.87	15.8901	14.3857	0	0	2.30414	1.65998	0	0	0	0	0	0	0	0	12.7449	1.50786	0	0	11.5947	9.67236
s11	5.74352	0.17507	4.68802	0.456297	26.29	0	0.120557	0.770078	0	126.782	0.514221	0.13422	0.402951	0	35.0703	0.121382	0.49547	0	0	0.169634	11.1578	0.322141	0.472102	4.36147	0	0.514718	0	0.511208	2169.04	2.97536	6.2036	0.893097	0.230121	0.867794	0.739719	0.297989	0.302989	0.0798015	1.86703	1.1385	0.158412	0	0.367787	6.39824	2.25062	1.74483	0.388597	3.20446	6.16999
s13	0	0.2702	6.43818	2.46406	50.3353	0.390212	0.272753	0.654208	0.238377	176.088	1.5785	0.258561	0.523031	0.414934	45.0032	0.359902	0.214337	0.200663	0.247075	1.93055	21.2962	0.481314	3.83162	13.0977	0.766401	1.32193	0.714994	0.982108	10106.6	6.52327	18.1725	0	0	2.4565	2.42813	0	0	0	0	0	0	0	0	15.9329	1.12026	0	0	13.7359	15.2851
s15	7.0893	0.710552	20.8447	1.97195	68.1854	0.342625	0.18045	1.72312	0.17049	210.537	1.97277	0.240402	0.797172	0.267151	47.2333	0.397154	0.351104	0	0.352512	1.0474	26.8536	0.765211	2.45991	17.5894	0.503987	2.02004	0.692048	1.95417	6824.15	8.78917	20.1383	1.19814	0.168335	3.00348	1.88963	0.624885	0.425358	0.120741	1.72304	1.22464	0.128105	0.261851	0.545319	14.1744	3.07023	1.21852	0.428499	12.7281	13.433
s16	1.97875	0.181874	3.49644	0.523862	17.2183	0	0	0.869379	0	104.907	1.44438	0	0.636207	0	29.9456	0.262181	0.212987	0	0.196828	0	9.89605	0	0.434058	3.51375	0	0.40287	0	0.597201	2004.76	0	5.75942	0	0	0.862795	0.573412	0	0	0.026785	0	0	0	0	0	8.78192	1.15537	0	0	3.34696	3.8507
s17	2.38691	0.289975	6.48849	1.0386	32.3569	0.186361	0	0.496308	0.139876	117.383	0.948748	0	0.429246	0.132384	33.4606	0.272269	0.271415	0	0	0.387031	14.6705	0.342529	0.756941	5.40295	0.249499	0.772997	0.164398	0.511394	2842.48	0	10.1003	1.19091	0.0597474	1.94261	0.757436	0	0	0.0425808	1.45235	0.964449	0	0.375648	0.771255	11.0586	1.99569	1.10096	0.618727	7.36798	7.37853
s18	4.08958	0.491924	8.60475	1.71127	37.0499	0.228046	0	1.60287	0	163.883	2.44006	0	0.854092	0.178503	37.6028	0.510039	0.181862	0	0.363788	0.445733	16.2593	0.34875	0.873595	8.755	0.266831	0.830044	0.252842	0.742637	4006.69	19.2452	17.5045	1.12703	0.58213	2.44208	1.62693	0.582683	0	0.0878421	5.04517	0	0.0802189	0	0.388921	15.2296	1.7027	5.00314	0.273784	10.0816	7.95057
s2	0	0.135707	3.42399	0.391308	16.2263	0	0	0.712975	0	105.6	1.01324	0	0.539084	0	26.9003	0.266012	0.195775	0	0.116404	0.230959	8.47937	0.123444	0.673217	3.93867	0.185072	0.379554	0.235997	0.418733	1807.41	0	2.8683	0	0	0.423504	0	0	0	0	0	0	0	0	0	4.3638	0	0	0	2.15763	3.26641
s20	0	0.119652	3.34987	0.335736	14.8801	0	0	0.381892	0	82.5479	0.903067	0	0.230623	0	21.9032	0.187214	0.168685	0	0	0.148023	10.139	0.214038	0.309121	5.63575	0	0.648753	0	0.586691	1598.68	0	4.05023	0	0	0.817995	0.272636	0	0	0.0224457	0	0	0	0	0	4.32849	0.501458	0	0	3.07935	3.86294
s3	0	0.188872	5.48327	0.557778	25.5302	0	0	0.680393	0	107.768	0.85633	0	0.534576	0	32.5435	0.281634	0.224734	0.130435	0	0.429237	15.6152	0.303247	1.04278	8.9989	0.125405	0.673167	0.282427	0.747558	2709.31	0	6.18201	0	0.0381953	0.877942	0.363231	0	0	0.0409158	0.836537	0	0	0.1885	0	7.61925	0.572957	0.773849	0	4.42432	4.56037
s5	0	0.187574	6.01501	0.581306	23.811	0	0	0.681019	0	104.54	1.16925	0	0.462304	0	26.9133	0.228483	0.154938	0	0	0.345329	11.5091	0.28956	1.18056	5.39123	0.164755	0.599749	0.337574	0.649198	1968.05	0	4.34968	0	0	0.604724	0	0	0	0	0	0	0	0	0	3.84311	0	0	0	2.93483	3.98447
s6	5.88977	0.327669	7.8226	0.869609	28.2757	0.240956	0	1.09714	0	140.265	2.60884	0.122664	0.832139	0.131519	38.3777	0.390687	0.254378	0	0.162542	0.186582	12.8013	0.280655	0.487974	4.22604	0.195639	0.576834	0.179885	0.488412	2415.98	1.95253	6.04986	0.909437	0.108338	0.621054	0.691031	0	0.29028	0.0949856	1.26923	0	0	0	0.468009	9.75394	2.49053	0	0.389326	3.9077	6.82145
[truncated: 378 more columns]

## Sheet: data_removed
	CE_16:0	CE_18:1	Cer_34:0;3	Cer_40:1;3	Cer_42:0;2	Cer_42:2;3	DAG_16:0_16:2	DAG_16:0_20:1	DAG_18:0_18:3	DAG_18:0_20:2	DAG_18:0_20:3	DAG_18:0_22:4	DAG_18:0_22:5	DAG_18:1_20:3	DAG_18:1_22:4	HexCer_34:0;2	HexCer_34:1;3	HexCer_42:0;4	HexCer_44:1;3	LPA_16:0	LPC_22:5	LPEO_18:1	LPS_16:0	LPS_18:2	PA_14:0_18:0	PA_16:0_18:2	PA_16:0_20:4	PA_16:0_22:4	PA_18:0_20:4	PA_18:2_18:2	PC_10:0_18:0	PC_14:0_20:3	PC_14:0_22:6	PC_14:1_20:0	PC_15:1_17:0	PC_15:1_18:0	PC_16:0_18:3	PC_16:0_19:1	PC_16:0_20:5	PC_16:0_22:3	PC_16:0_24:5	PC_16:1_20:0	PC_16:2_18:0	PC_17:0_18:1	PC_17:0_18:2	PC_17:1_18:0	PC_18:1_20:2	PC_18:1_22:5	PC_18:2_20:1
s10	0	0	0	0	0	0	0	0.0860264	0	0	0	0	0	0	0	0	0	0	0	0	3.48044	0	2.32587	0	2.67281	0	0	0	0	0	0	0	2.41564	0	0	0	0	0	0	0	0	0	0	0	0	0	0.383811	1.89651	0
s11	0	2.18735	0	0	0	0	0.0575128	0	0	0	0	0	0	0.115646	0	0	0	0	0	0	0	0	0	0	2.7324	0	0	0	0	0	0	0	0	0.161472	0	0.255863	0	0	0	0	0	0	0	0	0	0	0	0	0
s13	0	0	1.2862	0	0.209101	0.223204	0	0	0.389522	0	4.46557	0	1.37659	0	0	1.31487	1.40808	1.9622	1.21254	6.79913	1.67878	0.84139	0	2.60435	0	0	0	0	0	0	0	1.82223	0	0	0	0	2.05074	0.511841	0	0	0	0	0	1.51174	3.41867	0.638099	1.41364	0	0.649117
s15	0	0	0.262747	0	0	0	0	0.118458	0.0769668	1.35345	2.52712	1.79155	0.525505	0.304186	1.13435	0	0	0	1.6536	0	0	0	1.95401	2.94322	0	0	6.48379	2.22972	7.45225	6.23023	0	0	0	0	0.332212	1.10818	0	0	1.73519	1.20011	3.8834	3.90568	0.55402	0	0	0	0	0	0
s16	0	0	0	0	0	0	0	0	0	0	0	0	0	0	0	0	0	0	0	0	0	0	0	0	0	0	0	0	0	0	2.64814	0	0	0	0	0	0	0	0	0	0	0	0	0	0	0	0	0	0
s17	0	0	0	0.139193	0	0	0	0	0	0	0	0	0	0	0	0	0	0	0	0	0	0	0	0	0	0	0	0	0	0	0	0	0	0	0	0	0	0	0	0.399156	0	0	0	0	0	0	0	0	0
s18	2.44339	0	0	0.177784	0.253132	0	0	0	0	0	0	1.02198	0	0	0	0	0	0	0	0	0	0	0	0	0	0	0	0	0	0	0	0	2.33732	0	0	0	0	0	0	0	0	0	0	0	0	0	0	1.37032	0
s2	0	0	0	0	0	0	0	0	0	0	0	0	0	0	0	0	0	0	0	0	0	0	0	0	0	0	0	0	0	0	0	0	0	0	0	0	0	0	0	0	0	0	0	0	0	0	0	0	0
s20	0	0	0	0	0	0	0	0	0	0	0	0	0	0	0	0	0	0	0	0	0	0	0	0	0	0	0	0	0	0	0.948173	0	0	0	0	0	0	0	0	0	0	0	0	0	0	0	0	0	0
s3	0	0	0	0	0	0	0	0	0	0	0	0	0	0	0	0	0	0	0	0	0	0	0	0	0	0	0	0	0	0	0	0	0	0	0	0	0	0	0	0	0.647167	0	0	0	0	0	0	0	0
s5	0	0	0	0	0	0	0	0	0	0	0	0	0	0	0	0	0	0	0	0	0	0	0	0	0	0	0	0	0	0	0	0	0	0	0	0	0	0	0	0	0	0	0	0	0	0	0	0	0
s6	0	2.18182	0	0	0	0	0	0	0	0	0	0	0	0	0	0	0	0	0	18.2964	0	0	0	0	0	7.6449	4.43515	0	0	1.95085	0	0	0	0	0	0	0	0	0	0	0	0	0	0	0	0	0	0	0
[truncated: 92 more columns]
