# Supplementary material for: Tolerance of Stored Boar Spermatozoa to Autologous Seminal Plasma: A Proteomic and Lipidomic Approach
Source: Int J Mol Sci. 2020 Sep 4;21(18):6474. doi: 10.3390/ijms21186474 (PMC7555833; doi:10.3390/ijms21186474)
Supplement: Supplementary file 1 [file ijms-21-06474-s001.zip › Lipidomics_lipid_classes_SUPPLEMENTARY.xlsx]

## Sheet: class_picomol
	CE	Cer	Chol	CL	DAG	HexCer	LPC	LPCO	LPE	LPEO	LPS	PA	PC	PCO	PE	PEO	PI	PS	SM	TAG
s10	0	310.148	3988.87	15.8901	151.237	112.419	4.19516	5.69872	10.418	2.02577	4.42217	66.0519	550.518	747.012	179.505	1508.42	34.8498	2562.89	1200.48	5.03712
s11	5.74352	213.53	2169.04	2.97536	115.413	48.7103	1.89811	0	7.92375	0.748513	0	34.0678	232.995	89.4984	110.386	863.838	15.5188	1633.03	540.361	81.3654
s13	0	330.374	10106.6	6.52327	224.7	232.543	4.83141	3.01454	24.2016	0.575792	11.7613	85.6774	691.69	787.538	354.689	1652.21	77.9835	2226.39	997.128	1.95218
s15	7.0893	410.164	6824.15	8.78917	256.181	215.596	3.16454	2.24257	14.5582	0	9.94289	119.152	911.19	1099.65	367.597	2605.46	48.6955	2813.4	684.071	103.942
s16	1.97875	174.739	2004.76	0	70.0414	45.9891	0	7.66378	2.91773	2.56799	0	26.8487	207.858	126.193	85.0908	499.373	0	761.929	393.38	20.0348
s17	2.38691	217.152	2842.48	0	122.291	82.8898	2.71704	2.43627	8.54518	1.24205	3.34123	35.9161	230.287	241.355	144.545	1037.47	8.26176	1452.68	753.727	25.2587
s18	4.08958	284.478	4006.69	19.2452	174.58	71.6456	4.96049	13.3553	18.4789	1.26434	0	47.0068	425.721	562.996	185.416	1286.55	33.6916	2199.2	694.695	53.4322
s2	0	170.186	1807.41	0	72.0566	33.2168	0	2.60232	10.6157	0.684436	0	28.1275	189.939	53.527	87.4079	625.805	14.1287	1517.95	396.27	0
s20	0	142.689	1598.68	0	66.1509	43.6376	1.29106	0	9.97964	0	3.94353	0	137.208	100.909	78.9848	534.474	0	1576.16	294.596	0
s3	0	202.998	2709.31	0	106.416	86.7831	1.68134	0	9.89887	0.731147	0	44.4734	232.635	203.973	148.884	901.847	10.3682	1205.97	446.256	0.769704
s5	0	185.211	1968.05	0	62.3591	29.1578	0	9.72778	9.06198	1.60672	0	40.3164	309.679	157.31	90.2456	538.353	0	1430.28	196.806	0
s6	5.88977	241.202	2415.98	1.95253	117.403	61.892	1.94444	0	6.60437	0.574781	5.26292	49.7425	248.243	135.01	135.099	984.971	10.7555	1575.87	554.932	76.5828

## Sheet: class_Molpercent
	CE	Cer	Chol	CL	DAG	HexCer	LPC	LPCO	LPE	LPEO	LPS	PA	PC	PCO	PE	PEO	PI	PS	SM	TAG
s10	0	2.70633	34.8066	0.138656	1.31968	0.98096	0.0366067	0.0497266	0.0909068	0.0176768	0.0385876	0.576364	4.80378	6.51838	1.56635	13.1624	0.304097	22.3636	10.4753	0.0439536
s11	0.0931325	3.46243	35.1715	0.0482461	1.87145	0.789849	0.0307783	0	0.128485	0.0121373	0	0.552418	3.77806	1.45124	1.78994	14.0073	0.251641	26.48	8.76208	1.31936
s13	0	1.85391	56.7137	0.0366057	1.26091	1.30493	0.0271117	0.0169162	0.135809	0.00323109	0.0659989	0.480783	3.88145	4.41931	1.99035	9.27148	0.437608	12.4935	5.59543	0.0109548
s15	0.0429523	2.48508	41.3459	0.0532514	1.55214	1.30624	0.0191732	0.0135872	0.0882048	0	0.0602415	0.721911	5.52068	6.66254	2.22718	15.7858	0.295034	17.0457	4.14462	0.629762
s16	0.0446533	3.94323	45.2402	0	1.58058	1.03781	0	0.172944	0.0658427	0.0579503	0	0.605879	4.69061	2.84771	1.92019	11.2691	0	17.194	8.87718	0.452114
s17	0.0330827	3.00974	39.3969	0	1.69495	1.14886	0.0376583	0.0337668	0.118437	0.0172149	0.0463096	0.497799	3.19179	3.3452	2.0034	14.3794	0.114508	20.1342	10.4467	0.350087
s18	0.0405411	2.8201	39.7194	0.190783	1.73066	0.710241	0.0491746	0.132395	0.183186	0.0125337	0	0.465991	4.22028	5.58113	1.83808	12.7539	0.333994	21.8013	6.88669	0.529687
s2	0	3.39698	36.0766	0	1.43828	0.663019	0	0.0519433	0.211893	0.0136616	0	0.561435	3.79126	1.06842	1.74469	12.4913	0.282015	30.2988	7.90969	0
s20	0	3.10958	34.8395	0	1.4416	0.950979	0.0281356	0	0.217483	0	0.08594	0	2.99013	2.19907	1.72129	11.6476	0	34.3487	6.42003	0
s3	0	3.21555	42.9164	0	1.68567	1.37468	0.026633	0	0.156802	0.0115816	0	0.704474	3.68502	3.231	2.35838	14.2856	0.164236	19.1029	7.06886	0.0121924
s5	0	3.68348	39.1405	0	1.2402	0.57989	0	0.193466	0.180224	0.0319544	0	0.801812	6.15888	3.12857	1.7948	10.7068	0	28.4454	3.91407	0
s6	0.0888363	3.63809	36.4406	0.0294503	1.7708	0.933526	0.0293283	0	0.0996148	0.00866951	0.0793814	0.750274	3.74429	2.03637	2.03771	14.8565	0.162227	23.7691	8.37012	1.15511
